# Supplementary material
Source: PubMed Central journal article supplement (PMC3244080)
Supplement: NIHMS286245-supplement-01.pdf [file NIHMS286245-supplement-01.pdf]

**Table S1**

| Workflow                                                                      | Step                                                                                 | Time                                                                                                                                                                                                                    | Details                                                                                                                                                                                                                                                                           | Specific requirements                                                                                                                                                                                                                          | Key benefits (compared to CKO)                                                                                                                                 |
|-------------------------------------------------------------------------------|--------------------------------------------------------------------------------------|-------------------------------------------------------------------------------------------------------------------------------------------------------------------------------------------------------------------------|-----------------------------------------------------------------------------------------------------------------------------------------------------------------------------------------------------------------------------------------------------------------------------------|------------------------------------------------------------------------------------------------------------------------------------------------------------------------------------------------------------------------------------------------|----------------------------------------------------------------------------------------------------------------------------------------------------------------|
|                                                                               | PCR amplify shRNA                                                                    | 1 day                                                                                                                                                                                                                   | <b>Targeting vector:</b><br>Individual shRNAs are PCR amplified from single-stranded 97mer oligonucleotides using Pfx platinum polymerase (see Zuber et al., 2010). XhoI/EcoRI digested PCR fragments are cloned into any miR30 recipient vector, including pCol-TGM.             | <ul style="list-style-type: none"> <li>* 97mer shRNA oligo</li> <li>* miR30 For and Rev primers</li> <li>* Pfx platinum polymerase</li> <li>* PCR cyclor</li> <li>* XhoI and EcoRI</li> <li>* miR30-based vector (pCol-TGM,LMP,LMS)</li> </ul> | <b>Vector cloning can be completed in less than 1 week.</b><br>(1-6 months for traditional vector cloning)                                                     |
|                                                                               | Clone into miR30 backbone                                                            | 4 days                                                                                                                                                                                                                  |                                                                                                                                                                                                                                                                                   |                                                                                                                                                                                                                                                | <b>Vector design can be tested prior to ES cell production.</b>                                                                                                |
|                                                                               | Electroporate ES cells<br>Select with Hygromycin<br>Pick individual clones           | 3-4 weeks                                                                                                                                                                                                               | <b>Electroporation:</b><br>ES cells are coelectroporated with the pCol-TGM targeting vector and FlpE plasmid and plated on irradiated feeder cells. 48 hours post electroporation cells are selected with Hygromycin (140µg/ml) and individual clones are picked after 8-14 days. | <ul style="list-style-type: none"> <li>* KH2 ES cells</li> <li>* pCol-TGM targeting vector</li> <li>* FlpE plasmid</li> <li>* Hygromycin</li> <li>* Hygro resistant feeder cells</li> </ul>                                                    | <b>Electroporations can be performed on a smaller scale as fewer clones need to be screened. Therefore more constructs can be handled in parallel.</b>         |
|                                                                               | Test target gene knockdown in 3-4 clones                                             | 1 week                                                                                                                                                                                                                  | <b>Testing clones:</b><br>Individual ES clones are tested <i>in vitro</i> by treating with 1µg/ml doxycycline in the culture media for 4 days (or longer depending on target stability). For testing knockdown ES cells are cultured in the absence of feeders.                   | <ul style="list-style-type: none"> <li>* Doxycycline</li> <li>* Flow cytometer</li> </ul>                                                                                                                                                      | <b>Easy to assess gene silencing before further screening and mouse production.</b>                                                                            |
|                                                                               | Southern blot to confirm single integration at the ColA1 locus (GFP and ColA probes) | 5-7 days                                                                                                                                                                                                                | <b>Testing genomic integration:</b><br>Southern blot on gDNA from from ES cell clones confirms ColA targeting (ColA1 probe) and no off target integrations (GFP probe)<br>GFP probe: EcoRI digest<br>ColA1 probe: SpeI digest                                                     | <ul style="list-style-type: none"> <li>* GFP and ColA1 probes</li> <li>* 32P-dATP</li> <li>* SpeI</li> <li>* EcoRI</li> </ul>                                                                                                                  | <b>Approximately 90% of GFP positive/hygromycin resistant clones have single correct integration.</b><br>Efficiency of traditional targeting ranges from 1-20% |
| Produce transgenic mice by tetraploid complementation or blastocyst injection | 4 weeks                                                                              | <b>Mouse production:</b><br>Founder animals can be produced by tetraploid embryo complementation. These founder animals are 100% ES cell derived and F1 mice do not need to be screened for transmission of the allele. | <ul style="list-style-type: none"> <li>* Transgenic facility equipped for tetraploid embryo complementation or blastocyst injection.</li> </ul>                                                                                                                                   | <b>No screening of F1 generation for germline transmission. Founder animals can be used directly for experiments.</b>                                                                                                                          |                                                                                                                                                                |
